# Supplementary material for: User experience and real-world implementation of a peer-integrated digital health intervention for substance use disorder
Source: Research Square preprint supplement (doi:10.21203/rs.3.rs-9497767/v1), 2026-05-12

| **Supplemental Table: Client characteristics by protocol completion** | | | |
| --- | --- | --- | --- |
|  | **Yes  (N=50)** | **No  (N=25)** | **P-value** |
| **Age (years)** |  |  |  |
| Mean (SD) | 43.6 (11.6) | 46.3 (9.96) | 0.297 |
| Median [Min, Max] | 43.0 [22.0, 64.0] | 43.5 [28.0, 62.0] |  |
| **Sex** |  |  |  |
| Male | 25 (50.0%) | 8 (32.0%) | 0.271 |
| Female | 25 (50.0%) | 16 (64.0%) |  |
| **Latino/a** |  |  |  |
| Yes | 4 (8.0%) | 2 (8.0%) | 0.78 |
| No | 44 (88.0%) | 22 (88.0%) |  |
| I don't know | 1 (2.0%) | 0 (0%) |  |
| **Race** |  |  |  |
| American Indian or Alaska Native | 0 (0%) | 0 (0%) | NA |
| Asian | 0 (0%) | 0 (0%) |  |
| Black or African American | 30 (60.0%) | 20 (80.0%) |  |
| Native Hawaiian or Other Pacific Islander | 0 (0%) | 0 (0%) |  |
| White | 17 (34.0%) | 3 (12.0%) |  |
| Multi-racial | 0 (0%) | 0 (0%) |  |
| Other | 2 (4.0%) | 1 (4.0%) |  |
| **US Region participant is from** |  |  |  |
| Northeast | 30 (60.0%) | 11 (44.0%) | NA |
| Midwest | 0 (0%) | 0 (0%) |  |
| South | 16 (32.0%) | 13 (52.0%) |  |
| West | 3 (6.0%) | 0 (0%) |  |
| Outside the US | 0 (0%) | 0 (0%) |  |
| **OS Type** |  |  |  |
| iOS | 17 (34.0%) | 8 (32.0%) | 1 |
| Android | 31 (62.0%) | 15 (60.0%) |  |
| **Education level** |  |  |  |
| Bachelor’s or above | 7 (14.0%) | 2 (8.0%) | 0.707 |
| High school or below | 31 (62.0%) | 17 (68.0%) |  |
| Some college | 12 (24.0%) | 5 (20.0%) |  |
| **Employment in last 3 years** |  |  |  |
| Full-time | 23 (46.0%) | 10 (40.0%) | 0.695 |
| Other | 16 (32.0%) | 10 (40.0%) |  |
| Unemployed | 11 (22.0%) | 4 (16.0%) |  |
| **Income below poverty line** |  |  |  |
| No | 10 (20.0%) | 6 (24.0%) | 1 |
| Yes | 31 (62.0%) | 16 (64.0%) |  |
| **Time in Treatment** |  |  |  |
| 0-30 days | 12 (24.0%) | 3 (12.0%) | 0.251 |
| 1-3 months | 11 (22.0%) | 4 (16.0%) |  |
| 3-6 months | 8 (16.0%) | 3 (12.0%) |  |
| 6 months-1 year | 14 (28.0%) | 6 (24.0%) |  |
| 1-5 years | 3 (6.0%) | 6 (24.0%) |  |
| 5+ years | 1 (2.0%) | 1 (4.0%) |  |


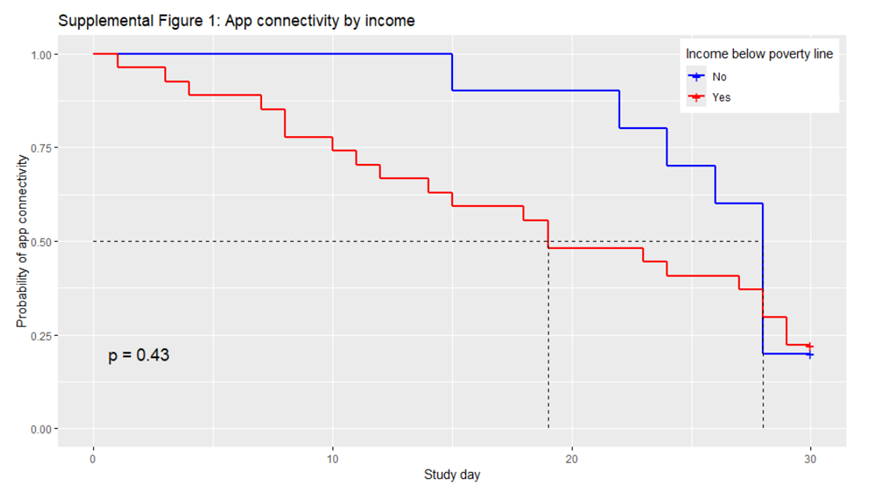


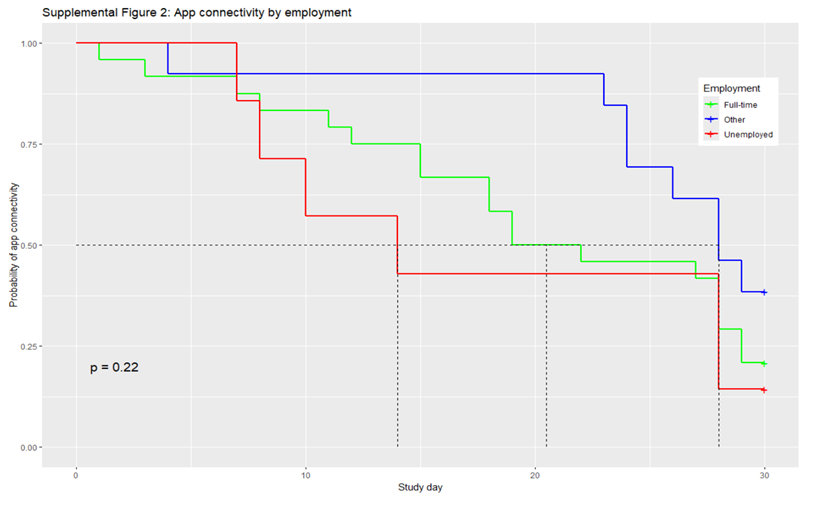


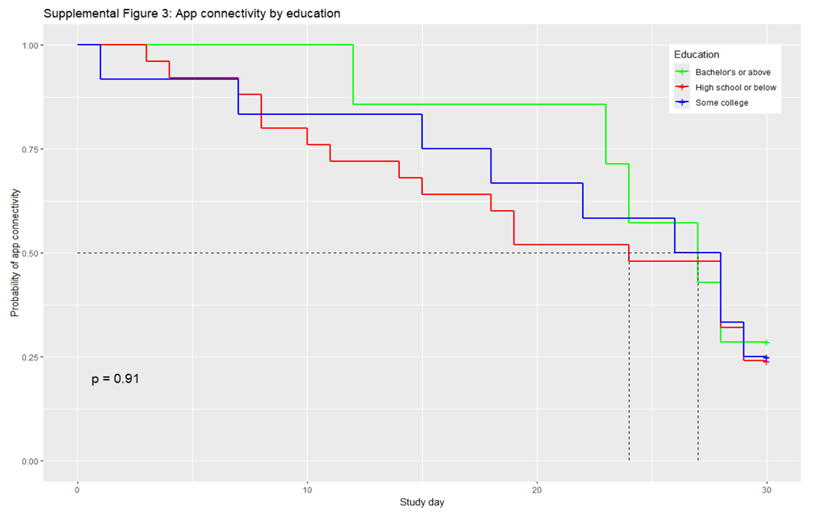

Supplement: Supplementary file 1 [file a949c9f5d85eb6774dcb8fef.docx]
